# Supplementary material
Source: MDPI journal article supplement (doi:10.3390/horticulturae12050579)
Supplement: s1 [file horticulturae-4258870-supplementary.pdf › horticulturae-4258870-supplementary.pdf]

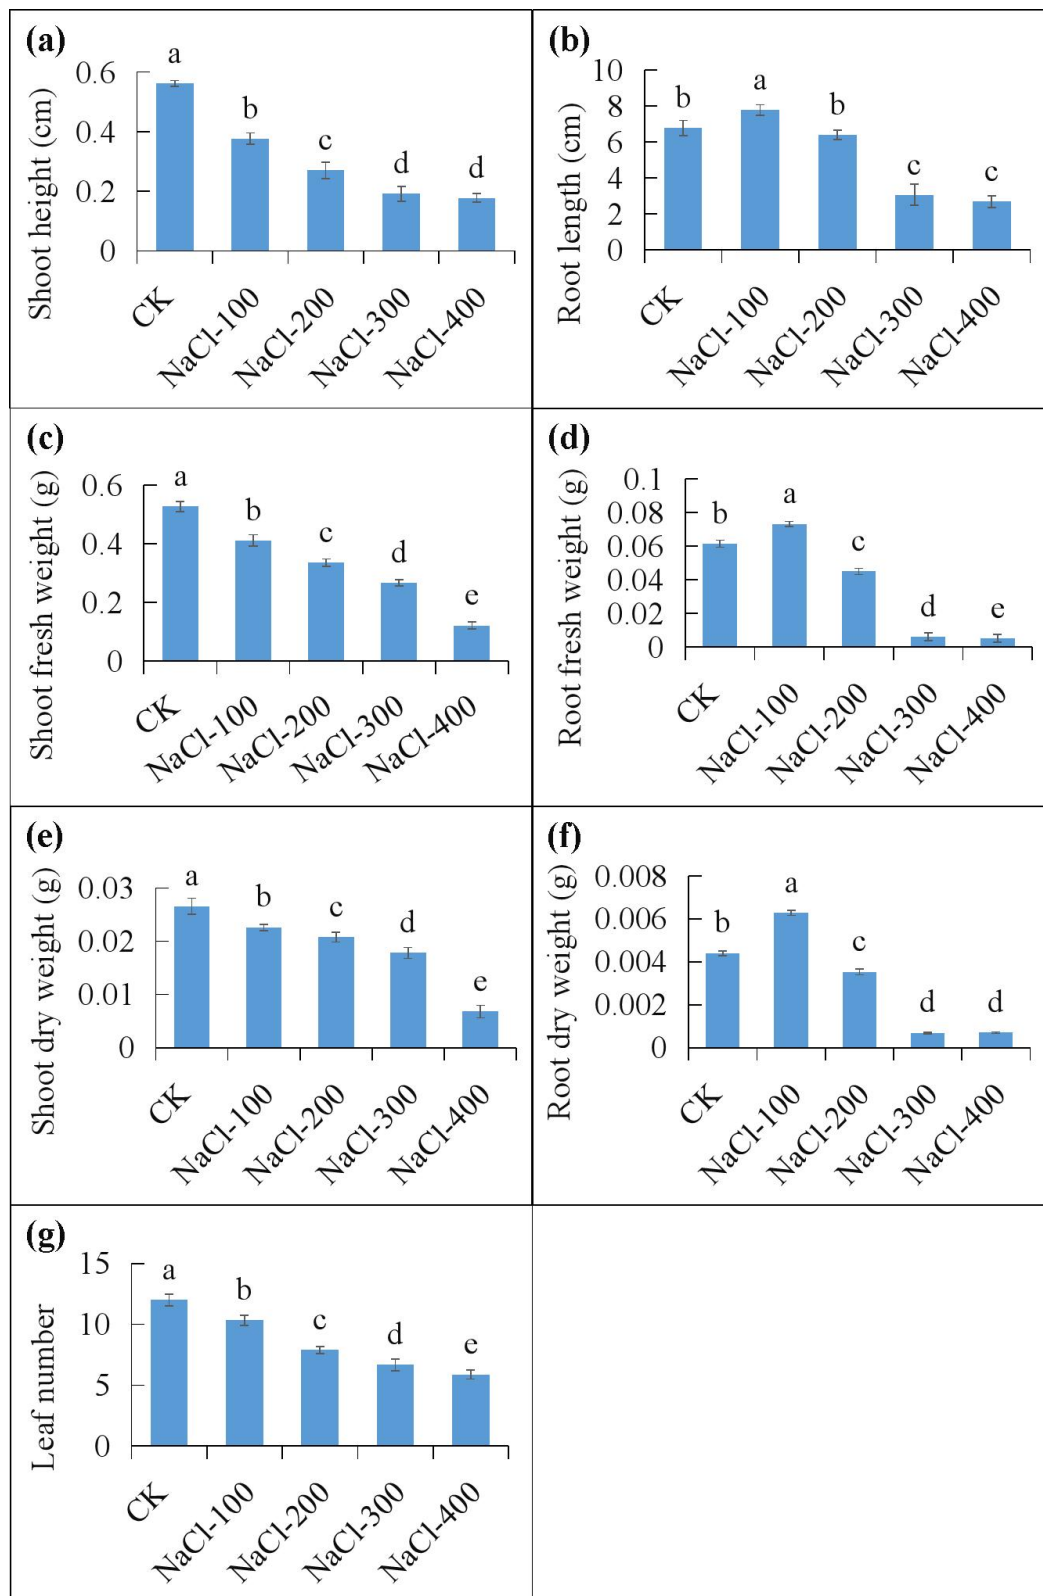

**Supplementary Fig. 1** Effects of different concentrations of salt stress on the growth of petunia. **(a)** Shoot height, **(b)** Root length; **(c)** Shoot fresh weight, **(d)** Root fresh weight; **(e)** Shoot dry weight, **(f)** Root dry weight, **(g)** Leaf number.

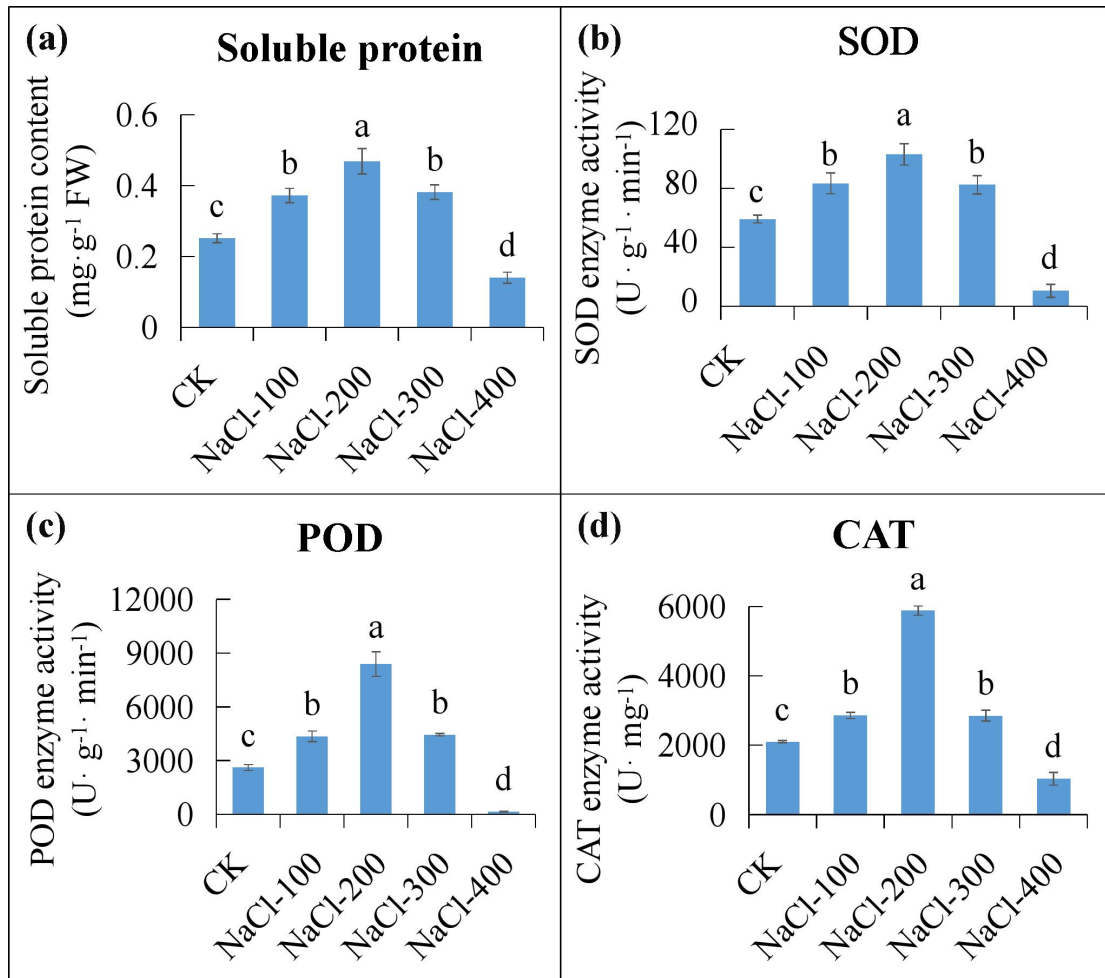

**Supplementary Fig. 2** Effects of different concentrations of salt stress on soluble protein content and antioxidant enzyme activities (SOD, POD, CAT) in *Petunia*.

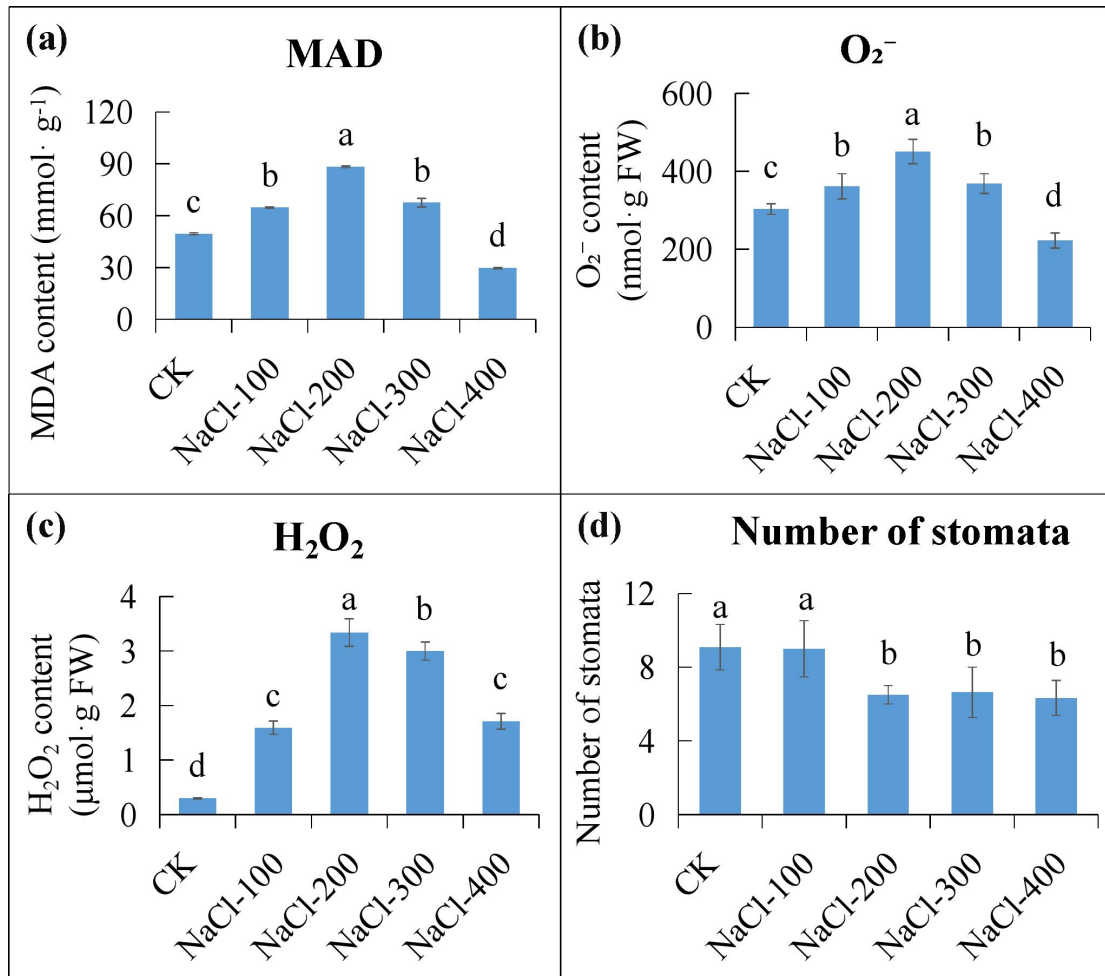

**Supplementary Fig. 3** Effects of different concentrations of salt stress on malondialdehyde (MAD), superoxide anion ( $\text{O}_2^-$ ), hydrogen peroxide ( $\text{H}_2\text{O}_2$ ) contents, and stomatal number in Petunia.
